# Supplementary material for: Biotope Impact on Fluctuating Asymmetry Manifestation in Ground beetles (Coleoptera, Carabidae)
Source: Preprints.org preprint supplement (doi:10.20944/preprints202012.0491.v1), 2020-12-21
Supplement: Supplementary file 1 [file supplementary]

lm(formula = FA_.dimensional ~ fBiotope * fSpecies + fBiotope * fSex, data = p)

| (a) Residuals: | | | | | |
| --- | --- | --- | --- | --- | --- |
| **Min** | **1Q** | **Median** | **3Q** | **Max** |  |
| -0.10796 | -0.01751 | -0.00430 | 0.00717 | 0.81427 |  |
| (b) Coefficients: (55 not defined because of singularities) | | | | | |
| **Source** | **Estimate** | **Std. Error** | **t value** | **Pr(>|t|)** |  |
| (Intercept) | -0.0068875 | 0.0182928 | -0.377 | 0.706564 |  |
| fBiotopelawn | 0.0600922 | 0.0156197 | 3.847 | 0.000122 | *** |
| fBiotopelinden | 0.0039741 | 0.0166512 | 0.239 | 0.811383 |  |
| fBiotopemeadow | 0.0435488 | 0.0168112 | 2.590 | 0.009637 | ** |
| fBiotopepine | 0.0101624 | 0.0147532 | 0.689 | 0.490990 |  |
| fBiotoperaspberry | 0.0041098 | 0.0170018 | 0.242 | 0.809011 |  |
| fBiotopeschrubs | -0.0089269 | 0.0264103 | -0.338 | 0.735385 |  |
| fBiotopespring wheat | -0.0264901 | 0.0210716 | -1.257 | 0.208810 |  |
| fBiotopeswamp | -0.0049598 | 0.0175027 | -0.283 | 0.776914 |  |
| fSpecies*C. сancellatus* | 0.0344359 | 0.0148969 | 2.312 | 0.020875 | * |
| fSpecies*C. granulatus* | 0.0179400 | 0.0178376 | 1.006 | 0.314633 |  |
| fSpecies*C. cancellatus* | 0.0199244 | 0.0201642 | 0.988 | 0.323190 |  |
| fSpecies*C. granulatus* | 0.0189590 | 0.0234126 | 0.810 | 0.418139 |  |
| fSpecies*P. melanarius* | 0.0081779 | 0.0112524 | 0.727 | 0.467430 |  |
| fSpecies*P. niger* | 0.0003282 | 0.0127675 | 0.026 | 0.979492 |  |
| fSpecies*P. oblongopunctatus* | 0.0344063 | 0.0112828 | 3.049 | 0.002315 | ** |
| fSpecies*P. rufipes* | 0.0070962 | 0.0128546 | 0.552 | 0.580971 |  |
| fSex2 | 0.0021602 | 0.0124648 | 0.173 | 0.862425 |  |
| fBiotopelawn:fSpecies*C. сancellatus* | NA | NA | NA | NA |  |
| fBiotopelinden:fSpecies*C. сancellatus* | -0.0280203 | 0.0092275 | -3.037 | 0.002416 | ** |
| fBiotopemeadow:fSpecies*C. сancellatus* | NA | NA | NA | NA |  |
| fBiotopepine:fSpecies*C. сancellatus* | NA | NA | NA | NA |  |
| fBiotoperaspberry:fSpecies*C. сancellatus* | NA | NA | NA | NA |  |
| fBiotopeschrubs:fSpecies*C. сancellatus* | NA | NA | NA | NA |  |
| fBiotope spring wheat:fSpecies*C. сancellatus* | NA | NA | NA | NA |  |
| fBiotopeswamp:fSpecies*C. сancellatus* | NA | NA | NA | NA |  |
| fBiotopelawn:fSpecies*C. granulatus* | NA | NA | NA | NA |  |
| fBiotopelinden:fSpecies*C. granulatus* | -0.0088347 | 0.0170301 | -0.519 | 0.603964 |  |
| fBiotopemeadow:fSpecies*C. granulatus* | NA | NA | NA | NA |  |
| fBiotopepine:fSpecies*C. granulatus* | NA | NA | NA | NA |  |
| fBiotoperaspberry:fSpecies*C. granulatus* | NA | NA | NA | NA |  |
| fBiotopeschrubs:fSpecies*C. granulatus* | NA | NA | NA | NA |  |
| fBiotope spring wheat: fSpecies*C. granulatus* | NA | NA | NA | NA |  |
| fBiotopeswamp:fSpecies*C. granulatus* | NA | NA | NA | NA |  |
| fBiotopelawn:fSpecies*C. cancellatus* | -0.0584872 | 0.0198396 | -2.948 | 0.003226 | ** |
| fBiotopelinden:fSpecies*C. cancellatus* | NA | NA | NA | NA |  |
| fBiotopemeadow:fSpecies*C. cancellatus* | -0.0657015 | 0.0209795 | -3.132 | 0.001757 | ** |
| fBiotopepine:fSpecies*C. cancellatus* | 0.0076774 | 0.0217562 | 0.353 | 0.724204 |  |
| fBiotoperaspberry:fSpecies*C. cancellatus* | NA | NA | NA | NA |  |
| fBiotopeschrubs:fSpecies*C. cancellatus* | NA | NA | NA | NA |  |
| fBiotope spring wheat: fSpecies*C. cancellatus* | NA | NA | NA | NA |  |
| fBiotopeswamp:fSpecies*C. cancellatus* | NA | NA | NA | NA |  |
| fBiotopelawn:fSpecies*C. granulatus* | -0.0619944 | 0.0248511 | -2.495 | 0.012669 | * |
| fBiotopelinden:fSpecies*C. granulatus* | -0.0041276 | 0.0237211 | -0.174 | 0.861875 |  |
| fBiotopemeadow:fSpecies*C. granulatus* | -0.0568774 | 0.0228714 | -2.487 | 0.012950 | * |
| fBiotopepine:fSpecies*C. granulatus* | NA | NA | NA | NA |  |
| fBiotoperaspberry:fSpecies*C. granulatus* | NA | NA | NA | NA |  |
| fBiotopeschrubs:fSpecies*C. granulatus* | NA | NA | NA | NA |  |
| fBiotope spring wheat:fSpecies*C. granulatus* | NA | NA | NA | NA |  |
| fBiotopeswamp:fSpecies*C. granulatus* | NA | NA | NA | NA |  |
| fBiotopelawn:fSpecies*P. melanarius* | NA | NA | NA | NA |  |
| fBiotopelinden:fSpecies*P. melanarius* | 0.0122494 | 0.0085440 | 1.434 | 0.151782 |  |
| fBiotopemeadow:fSpecies*P. melanarius* | 0.0464463 | 0.0095733 | 4.852 | 1.3e-06 | *** |
| fBiotopepine:fSpecies*P. melanarius* | NA | NA | NA | NA |  |
| fBiotoperaspberry:fSpecies*P. melanarius* | NA | NA | NA | NA |  |
| fBiotopeschrubs:fSpecies*P. melanarius* | NA | NA | NA | NA |  |
| fBiotope spring wheat: fSpecies*P. melanarius* | NA | NA | NA | NA |  |
| fBiotopeswamp:fSpecies*P. melanarius* | NA | NA | NA | NA |  |
| fBiotopelawn:fSpecies*P. niger* | NA | NA | NA | NA |  |
| fBiotopelinden:fSpecies*P. niger* | NA | NA | NA | NA |  |
| fBiotopemeadow:fSpecies*P. niger* | NA | NA | NA | NA |  |
| fBiotopepine:fSpecies*P. niger* | NA | NA | NA | NA |  |
| fBiotoperaspberry:fSpecies*P. niger* | NA | NA | NA | NA |  |
| fBiotopeschrubs:fSpecies*P. niger* | NA | NA | NA | NA |  |
| fBiotope spring wheat: fSpecies*P. niger* | NA | NA | NA | NA |  |
| fBiotopeswamp:fSpecies*P. niger* | NA | NA | NA | NA |  |
| fBiotopelawn:fSpecies*P. oblongopunctatus* | NA | NA | NA | NA |  |
| fBiotopelinden:fSpecies*P.oblongopunctatus* | NA | NA | NA | NA |  |
| fBiotopemeadow:fSpecies*P. oblongopunctatus* | NA | NA | NA | NA |  |
| fBiotopepine:fSpecies*P. oblongopunctatus* | NA | NA | NA | NA |  |
| fBiotoperaspberry:fSpecies*P. oblongopunctatus* | NA | NA | NA | NA |  |
| fBiotopeschrubs:fSpecies*P. oblongopunctatus* | NA | NA | NA | NA |  |
| fBiotope spring wheat: fSpecies*P. oblongopunctatus* | NA | NA | NA | NA |  |
| fBiotopeswamp:fSpecies*P. oblongopunctatus* | NA | NA | NA | NA |  |
| fBiotopelawn:fSpecies*P. rufipes* | NA | NA | NA | NA |  |
| fBiotopelinden:fSpecies*P. rufipes* | NA | NA | NA | NA |  |
| fBiotopemeadow:fSpecies*P. rufipes* | NA | NA | NA | NA |  |
| fBiotopepine:fSpecies*P. rufipes* | NA | NA | NA | NA |  |
| fBiotoperaspberry:fSpecies*P. rufipes* | NA | NA | NA | NA |  |
| fBiotopeschrubs:fSpecies*P. rufipes* | NA | NA | NA | NA |  |
| fBiotope spring wheat: fSpecies*P. rufipes* | NA | NA | NA | NA |  |
| fBiotopeswamp:fSpecies*P. rufipes* | NA | NA | NA | NA |  |
| fBiotopelawn:fSex2 | 0.0008809 | 0.0142627 | 0.062 | 0.950757 |  |
| fBiotopelinden:fSex2 | -0.0020389 | 0.0129649 | -0.157 | 0.875050 |  |
| fBiotopemeadow:fSex2 | 0.0186556 | 0.0136263 | 1.369 | 0.171087 |  |
| fBiotopepine:fSex2 | -0.0050023 | 0.0130022 | -0.385 | 0.700469 |  |
| fBiotoperaspberry:fSex2 | -0.0037163 | 0.0143444 | -0.259 | 0.795597 |  |
| fBiotopeschrubs:fSex2 | 0.0014618 | 0.0275906 | 0.053 | 0.957750 |  |
| fBiotopespring wheat:fSex2 | -0.0003281 | 0.0195674 | -0.017 | 0.986623 |  |
| fBiotopeswamp:fSex2 | NA | NA | NA | NA |  |

Signif.codes: 0 ‘***’ 0.001 ‘**’ 0.01 ‘*’ 0.05 ‘.’ 0.1 ‘ ’ 1. Residual standard error: 0.05096 on 2650 degrees of freedom. Multiple R-squared: 0.2829, Adjusted R-squared: 0.2737. F-statistic: 30.75 on 34 and 2650 DF, p-value: < 2.2e-16.
