# Supplementary material for: Biotope Impact on Fluctuating Asymmetry Manifestation in Ground beetles (Coleoptera, Carabidae)
Source: Preprints.org preprint supplement (doi:10.20944/preprints202012.0491.v1), 2020-12-21
Supplement: Supplementary file 5 [file Table S2.docx]

lm(formula = FA_.dimensional ~ fBiotope + fSpecies + fSex, data = p)

| (a) Residuals: | | | | | |
| --- | --- | --- | --- | --- | --- |
| **Min** | **1Q** | **Median** | **3Q** | **Max** |  |
| -0.09493 | -0.01923 | -0.00737 | 0.00796 | 0.80970 |  |
| (b) Coefficients: | | | | | |
| **Source** | **Estimate** | **Std. Error** | **t value** | **Pr(>|t|)** |  |
| (Intercept) | 0.035548 | 0.013338 | 2.665 | 0.007741 | ** |
| fBiotopelawn | 0.017611 | 0.007617 | 2.312 | 0.020846 | * |
| fBiotopelinden | -0.033330 | 0.007452 | -4.473 | 8.04e-06 | *** |
| fBiotopemeadow | 0.029456 | 0.007074 | 4.164 | 3.23e-05 | *** |
| fBiotopepine | -0.036119 | 0.007212 | -5.008 | 5.86e-07 | *** |
| fBiotoperaspberry | -0.025720 | 0.008503 | -3.025 | 0.002513 | ** |
| fBiotopeschrubs | 0.008681 | 0.013646 | 0.636 | 0.524706 |  |
| fBiotopespring wheat | -0.041549 | 0.011410 | -3.642 | 0.000276 | *** |
| fBiotopeswamp | 0.011307 | 0.013071 | 0.865 | 0.387099 |  |
| fSpecies*C. сancellatus* | 0.006314 | 0.012277 | 0.514 | 0.607066 |  |
| fSpecies*C. granulatus* | 0.005003 | 0.012777 | 0.392 | 0.695395 |  |
| fSpecies*C. cancellatus* | -0.031376 | 0.012515 | -2.507 | 0.012231 | * |
| fSpecies*C.granulatus* | -0.040785 | 0.012182 | -3.348 | 0.000826 | *** |
| fSpecies*P. melanarius* | 0.016596 | 0.011440 | 1.451 | 0.146974 |  |
| fSpecies*P. niger* | 0.002462 | 0.013063 | 0.188 | 0.850528 |  |
| fSpecies*P.oblongopunctatus* | 0.032935 | 0.011509 | 2.862 | 0.004248 | ** |
| fSpecies*P. rufipes* | -0.001379 | 0.011833 | -0.117 | 0.907208 |  |
| fSex2 | 0.003202 | 0.002085 | 1.535 | 0.124825 |  |

Signif.codes: 0 ‘***’ 0.001 ‘**’ 0.01 ‘*’ 0.05 ‘.’ 0.1 ‘ ’ 1. Residual standard error: 0.05233 on 2667 degrees of freedom. Multiple R-squared: 0.239, Adjusted R-squared: 0.2341. F-statistic: 49.27 on 17 and 2667 DF, p-value: < 2.2e-16
