# Supplementary material for: Biotope Impact on Fluctuating Asymmetry Manifestation in Ground beetles (Coleoptera, Carabidae)
Source: Preprints.org preprint supplement (doi:10.20944/preprints202012.0491.v1), 2020-12-21
Supplement: Supplementary file 8 [file Table S3.docx]

lm(formula = FA_meristic ~ fBiotope * fSpecies + fBiotope * fSex, data = p)

| (a) Residuals: | | | | | |
| --- | --- | --- | --- | --- | --- |
| **Min** | **1Q** | **Median** | **3Q** | **Max** |  |
| -0.16839 | -0.01742 | -0.01314 | 0.00480 | 0.83161 |  |
| (b) Coefficients: (55 not defined because of singularities) | | | | | |
| **Source** | **Estimate** | **Std. Error** | **t value** | **Pr(>|t|)** |  |
| (Intercept) | 0.1571472 | 0.0168471 | 9.328 | < 2e-16 | *** |
| fBiotopelawn | 0.0091687 | 0.0143941 | 0.637 | 0.52419 |  |
| fBiotopе linden | -0.0005642 | 0.0153352 | -0.037 | 0.97065 |  |
| fBiotopemeadow | 0.0171244 | 0.0154826 | 1.106 | 0.26881 |  |
| fBiotopepine | 0.0081022 | 0.0135872 | 0.596 | 0.55102 |  |
| fBiotoperaspberry | -0.0063544 | 0.0156581 | -0.406 | 0.68491 |  |
| fBiotopeschrubs | -0.0227922 | 0.0243231 | -0.937 | 0.34881 |  |
| fBiotope spring wheat | -0.0115180 | 0.0194062 | -0.594 | 0.55288 |  |
| fBiotope swamp | -0.0169929 | 0.0161194 | -1.054 | 0.29189 |  |
| fSpecies*C. сancellatus* | -0.1003108 | 0.0137195 | -7.312 | 3.48e-13 | *** |
| fSpecies*C. granulatus* | -0.1075668 | 0.0164279 | -6.548 | 6.99e-11 | *** |
| fSpecies*C. cancellatus* | -0.1235060 | 0.0185706 | -6.651 | 3.53e-11 | *** |
| fSpecies*C. granulatus* | -0.1191720 | 0.0215622 | -5.527 | 3.58e-08 | *** |
| fSpecies*P. melanarius* | -0.1571974 | 0.0103631 | -15.169 | < 2e-16 | *** |
| fSpecies*P. niger* | -0.1626481 | 0.0117584 | -13.832 | < 2e-16 | *** |
| fSpecies*P. oblongopunctatus* | -0.1521102 | 0.0103911 | -14.638 | < 2e-16 | *** |
| fSpecies*P.rufipes* | -0.1380143 | 0.0118387 | -11.658 | < 2e-16 | *** |
| fSex2 | 0.0002179 | 0.0114797 | 0.019 | 0.98486 |  |
| fBiotopelawn:fSpecies*C. сancellatus* | NA | NA | NA | NA |  |
| fBiotopelinden:fSpecies*C. сancellatus* | 0.0009962 | 0.0084983 | 0.117 | 0.90670 |  |
| fBiotopemeadow:fSpecies*C. сancellatus* | NA | NA | NA | NA |  |
| fBiotopepine:fSpecies*C.сancellatus* | NA | NA | NA | NA |  |
| fBiotoperaspberry:fSpecies*C. сancellatus* | NA | NA | NA | NA |  |
| fBiotopeschrubs:fSpecies*C. сancellatus* | NA | NA | NA | NA |  |
| fBiotopespring wheat: fSpecies*C. сancellatus* | NA | NA | NA | NA |  |
| fBiotopeswamp:fSpecies*C. сancellatus* | NA | NA | NA | NA |  |
| fBiotopelawn:fSpecies*C. granulatus* | NA | NA | NA | NA |  |
| fBiotopelinden:fSpecies*C. granulatus* | 0.0055825 | 0.0156842 | 0.356 | 0.72192 |  |
| fBiotopemeadow:fSpecies*C. granulatus* | NA | NA | NA | NA |  |
| fBiotopepine:fSpecies*C. granulatus* | NA | NA | NA | NA |  |
| fBiotoperaspberry:fSpecies*C. granulatus* | NA | NA | NA | NA |  |
| fBiotopeschrubs:fSpecies*C. granulatus* | NA | NA | NA | NA |  |
| fBiotopespring wheat: fSpecies*C. granulatus* | NA | NA | NA | NA |  |
| fBiotopeswamp:fSpecies*C. granulatus* | NA | NA | NA | NA |  |
| fBiotopelawn:fSpecies*C. cancellatus* | -0.0098157 | 0.0182729 | -0.537 | 0.59119 |  |
| fBiotopelinden:fSpecies*C.cancellatus* | NA | NA | NA | NA |  |
| fBiotopemeadow:fSpecies*C. cancellatus* | -0.0233033 | 0.0193214 | -1.206 | 0.22789 |  |
| fBiotopepine:fSpecies*C. cancellatus* | -0.0057269 | 0.0200368 | -0.286 | 0.77504 |  |
| fBiotoperaspberry:fSpecies*C. cancellatus* | NA | NA | NA | NA |  |
| fBiotopeschrubs:fSpecies*C. cancellatus* | NA | NA | NA | NA |  |
| fBiotopespring wheat: fSpecies*C. cancellatus* | NA | NA | NA | NA |  |
| fBiotopeswamp:fSpecies*C. cancellatus* | NA | NA | NA | NA |  |
| fBiotopelawn:fSpecies*C. granulatus* | -0.0110267 | 0.0228883 | -0.482 | 0.63001 |  |
| fBiotopelinden:fSpecies*C. granulatus* | -0.0161217 | 0.0218464 | -0.738 | 0.46061 |  |
| fBiotopemeadow:fSpecies*C. granulatus* | -0.0301058 | 0.0210638 | -1.429 | 0.15305 |  |
| fBiotopepine:fSpecies*C. granulatus* | NA | NA | NA | NA |  |
| fBiotoperaspberry:fSpecies*C. granulatus* | NA | NA | NA | NA |  |
| fBiotopeschrubs:fSpecies*C. granulatus* | NA | NA | NA | NA |  |
| fBiotopespring wheat: fSpecies*C. granulatus* | NA | NA | NA | NA |  |
| fBiotopeswamp:fSpecies*C. granulatus* | NA | NA | NA | NA |  |
| fBiotopelawn:fSpecies*P. melanarius* | NA | NA | NA | NA |  |
| fBiotopelinden:fSpecies*P. melanarius* | 0.0212874 | 0.0078688 | 2.705 | 0.00687 | ** |
| fBiotopemeadow:fSpecies*P. melanarius* | 0.0138034 | 0.0088167 | 1.566 | 0.11756 |  |
| fBiotopepine:fSpecies*P. melanarius* | NA | NA | NA | NA |  |
| fBiotoperaspberry:fSpecies*P. melanarius* | NA | NA | NA | NA |  |
| fBiotopeschrubs:fSpecies*P. melanarius* | NA | NA | NA | NA |  |
| fBiotopespring wheat: fSpecies*P. melanarius* | NA | NA | NA | NA |  |
| fBiotopeswamp:fSpecies*P. melanarius* | NA | NA | NA | NA |  |
| fBiotopelawn:fSpecies*P. niger* | NA | NA | NA | NA |  |
| fBiotopelinden:fSpecies*P. niger* | NA | NA | NA | NA |  |
| fBiotopemeadow:fSpecies*P. niger* | NA | NA | NA | NA |  |
| fBiotopepine:fSpecies*P. niger* | NA | NA | NA | NA |  |
| fBiotoperaspberry:fSpecies*P. niger* | NA | NA | NA | NA |  |
| fBiotopeschrubs:fSpecies*P. niger* | NA | NA | NA | NA |  |
| fBiotopespring wheat:fSpecies*P. niger* | NA | NA | NA | NA |  |
| fBiotopeswamp:fSpecies*P. niger* | NA | NA | NA | NA |  |
| fBiotopelawn:fSpecies*P. oblongopunctatus* | NA | NA | NA | NA |  |
| fBiotopelinden:fSpecies*P. oblongopunctatus* | NA | NA | NA | NA |  |
| fBiotopemeadow:fSpecies*P. oblongopunctatus* | NA | NA | NA | NA |  |
| fBiotopepine:fSpecies*P. oblongopunctatus* | NA | NA | NA | NA |  |
| fBiotoperaspberry:fSpecies*P. oblongopunctatus* | NA | NA | NA | NA |  |
| fBiotopeschrubs:fSpecies*P. oblongopunctatus* | NA | NA | NA | NA |  |
| fBiotopespring wheat: fSpecies*P.оblongopunctatus* | NA | NA | NA | NA |  |
| fBiotopeswamp:fSpecies*P. oblongopunctatus* | NA | NA | NA | NA |  |
| fBiotopelawn:fSpecies*P. rufipes* | NA | NA | NA | NA |  |
| fBiotopelinden:fSpecies*P. rufipes* | NA | NA | NA | NA |  |
| fBiotopemeadow:fSpecies*P. rufipes* | NA | NA | NA | NA |  |
| fBiotopepine:fSpecies*P. rufipes* | NA | NA | NA | NA |  |
| fBiotoperaspberry:fSpecies*P.rufipes* | NA | NA | NA | NA |  |
| fBiotopeschrubs:fSpecies*P. rufipes* | NA | NA | NA | NA |  |
| fBiotopespring wheat: fSpecies*P. rufipes* | NA | NA | NA | NA |  |
| fBiotopeswamp:fSpecies*P.rufipes* | NA | NA | NA | NA |  |
| fBiotopelawn:fSex2 | -0.0021502 | 0.0131426 | -0.164 | 0.87005 |  |
| fBiotopelinden:fSex2 | -0.0040822 | 0.0119403 | -0.342 | 0.73246 |  |
| fBiotopemeadow:fSex2 | -0.0072552 | 0.0125494 | -0.578 | 0.56322 |  |
| fBiotopepine:fSex2 | 0.0029261 | 0.0119746 | 0.244 | 0.80697 |  |
| fBiotoperaspberry:fSex2 | -0.0054974 | 0.0132107 | -0.416 | 0.67735 |  |
| fBiotopeschrubs:fSex2 | 0.0152727 | 0.0254101 | 0.601 | 0.54786 |  |
| fBiotopespring wheat:fSex2 | 0.0079723 | 0.0180209 | 0.442 | 0.65824 |  |
| fBiotopeswamp:fSex2 | NA | NA | NA | NA |  |

Signif.codes: 0 ‘***’ 0.001 ‘**’ 0.01 ‘*’ 0.05 ‘.’ 0.1 ‘ ’ 1. Residual standard error: 0.04693 on 2648 degrees of freedom(2 observations deleted due to missingness). Multiple R-squared: 0.1427, Adjusted R-squared: 0.1317. F-statistic: 12.96 on 34 and 2648 DF, p-value: < 2.2e-16.
