# Supplementary material for: Biotope Impact on Fluctuating Asymmetry Manifestation in Ground beetles (Coleoptera, Carabidae)
Source: Preprints.org preprint supplement (doi:10.20944/preprints202012.0491.v1), 2020-12-21
Supplement: Supplementary file 11 [file Table S4.docx]

lm(formula = FA_meristic ~ fBiotope + fSpecies + fSex, data = p)

| (a) Residuals: | | | | | |
| --- | --- | --- | --- | --- | --- |
| **Min** | **1Q** | **Median** | **3Q** | **Max** |  |
| -0.16798 | -0.01815 | -0.01337 | 0.00920 | 0.83316 |  |
| (b) Coefficients: | | | | | |
| **Source** | **Estimate** | **Std. Error** | **t value** | **Pr(>|t|)** |  |
| (Intercept) | 0.176508 | 0.011988 | 14.724 | <2e-16 | *** |
| fBiotopelawn | -0.005647 | 0.006848 | -0.825 | 0.4097 |  |
| fBiotopelinden | -0.006102 | 0.006697 | -0.911 | 0.3623 |  |
| fBiotopemeadow | 0.000380 | 0.006358 | 0.060 | 0.9524 |  |
| fBiotopepine | -0.008532 | 0.006483 | -1.316 | 0.1883 |  |
| fBiotoperaspberry | -0.013967 | 0.007643 | -1.828 | 0.0677 | . |
| fBiotopeschrubs | 0.001831 | 0.012264 | 0.149 | 0.8814 |  |
| fBiotopespring wheat | -0.011798 | 0.010255 | -1.151 | 0.2500 |  |
| fBiotopeswamp | -0.002891 | 0.011748 | -0.246 | 0.8056 |  |
| fSpecies*C. сancellatus* | -0.114320 | 0.011034 | -10.361 | <2e-16 | *** |
| fSpecies*C.granulatus* | -0.115724 | 0.011483 | -10.078 | <2e-16 | *** |
| fSpecies*C.cancellatus* | -0.143799 | 0.011248 | -12.784 | <2e-16 | *** |
| fSpecies*C.granulatus* | -0.151276 | 0.010949 | -13.816 | <2e-16 | *** |
| fSpecies*P. melanarius* | -0.153912 | 0.010281 | -14.970 | <2e-16 | *** |
| fSpecies*P. niger* | -0.164161 | 0.011740 | -13.983 | <2e-16 | *** |
| fSpecies*P. оblongopunctatus* | -0.154609 | 0.010344 | -14.947 | <2e-16 | *** |
| fSpecies*P.rufipes* | -0.151112 | 0.010635 | -14.209 | <2e-16 | *** |
| fSex2 | -0.001141 | 0.001875 | -0.609 | 0.5427 |  |

Signif.codes: 0 ‘***’ 0.001 ‘**’ 0.01 ‘*’ 0.05 ‘.’ 0.1 ‘ ’ 1. Residual standard error: 0.04703 on 2665 degrees of freedom (2 observations deleted due to missingness). Multiple R-squared: 0.1335,Adjusted R-squared: 0.128 .F-statistic: 24.16 on 17 and 2665 DF, p-value: < 2.2e-16
