# Supplementary material for: Biotope Impact on Fluctuating Asymmetry Manifestation in Ground beetles (Coleoptera, Carabidae)
Source: Preprints.org preprint supplement (doi:10.20944/preprints202012.0491.v1), 2020-12-21
Supplement: Supplementary file 14 [file Table S5.docx]

lm(formula = FA_dimensional ~ fBiotope * fSex, data = p)

| (a) Residuals: | | | | | |
| --- | --- | --- | --- | --- | --- |
| **Min** | **1Q** | **Median** | **3Q** | **Max** |  |
| -0.03995 | -0.00976 | -0.00665 | -0.00124 | 0.34467 |  |
| (b) Coefficients: | | | | | |
| **Source** | **Estimate** | **Std. Error** | **t value** | **Pr(>|t|)** |  |
| (Intercept) | 0.031108 | 0.003392 | 9.171 | < 2e-16 | *** |
| fBiotopebarley | -0.024456 | 0.003788 | -6.456 | 1.39e-10 | *** |
| fBiotopecarrot | -0.026052 | 0.004619 | -5.640 | 1.98e-08 | *** |
| fBiotopelucerne | -0.018956 | 0.004961 | -3.821 | 0.000138 | *** |
| fBiotopemaize | -0.021350 | 0.004797 | -4.451 | 9.11e-06 | *** |
| fBiotopeoats | -0.016984 | 0.003683 | -4.611 | 4.30e-06 | *** |
| fBiotopepea | -0.025197 | 0.004000 | -6.300 | 3.78e-10 | *** |
| fBiotopespring wheat | -0.029870 | 0.003913 | -7.634 | 3.75e-14 | *** |
| fBiotopewinter wheat | -0.022316 | 0.003744 | -5.961 | 3.03e-09 | *** |
| fSex2 | 0.008838 | 0.004556 | 1.940 | 0.052549 |  |
| fBiotopebarley:fSex2 | -0.008373 | 0.005235 | -1.600 | 0.109885 |  |
| fBiotopecarrot:fSex2 | -0.010684 | 0.006845 | -1.561 | 0.118713 |  |
| fBiotopelucerne:fSex2 | -0.008095 | 0.006421 | -1.261 | 0.207570 |  |
| fBiotopemaize:fSex2 | -0.001556 | 0.006927 | -0.225 | 0.822337 |  |
| fBiotopeoats:fSex2 | -0.010101 | 0.005181 | -1.949 | 0.051401 | . |
| fBiotopepea:fSex2 | -0.003836 | 0.005664 | -0.677 | 0.498387 |  |
| fBiotopespring wheat:fSex2 | -0.007859 | 0.005562 | -1.413 | 0.157817 |  |
| fBiotopewinter wheat:fSex2 | -0.010163 | 0.005054 | -2.011 | 0.044501 | * |

Signif.codes: 0 ‘***’ 0.001 ‘**’ 0.01 ‘*’ 0.05 ‘.’ 0.1 ‘ ’ 1. Residual standard error: 0.02172 on 1725 degrees of freedom. Multiple R-squared: 0.1034,Adjusted R-squared: 0.09459. F-statistic: 11.7 on 17 and 1725 DF, p-value: < 2.2e-16.
