# Supplementary material for: Biotope Impact on Fluctuating Asymmetry Manifestation in Ground beetles (Coleoptera, Carabidae)
Source: Preprints.org preprint supplement (doi:10.20944/preprints202012.0491.v1), 2020-12-21
Supplement: Supplementary file 17 [file Table S6.docx]

lm(formula = FA_dimensional ~ fBiotope + fSex, data = p)

| (a) Residuals: | | | | | |
| --- | --- | --- | --- | --- | --- |
| **Min** | **1Q** | **Median** | **3Q** | **Max** |  |
| -0.03640 | -0.00852 | -0.00736 | -0.00127 | 0.34821 |  |
| (b) Coefficients: | | | | | |
| **Source** | **Estimate** | **Std. Error** | **t value** | **Pr(>|t|)** |  |
| (Intercept) | 0.0355155 | 0.0023402 | 15.176 | < 2e-16 | *** |
| fBiotopebarley | -0.0290437 | 0.0026025 | -11.160 | < 2e-16 | *** |
| fBiotopecarrot | -0.0314887 | 0.0033602 | -9.371 | < 2e-16 | *** |
| fBiotopelucerne | -0.0234556 | 0.0031391 | -7.472 | 1.25e-13 | *** |
| fBiotopemaize | -0.0230557 | 0.0034340 | -6.714 | 2.56e-11 | *** |
| fBiotopeoats | -0.0221186 | 0.0025582 | -8.646 | < 2e-16 | *** |
| fBiotopepea | -0.0279731 | 0.0028049 | -9.973 | < 2e-16 | *** |
| fBiotopespring wheat | -0.0342436 | 0.0027473 | -12.464 | < 2e-16 | *** |
| fBiotopewinter wheat | -0.0278832 | 0.0025146 | -11.088 | < 2e-16 | *** |
| fSex2 | 0.0008871 | 0.0010648 | 0.833 | 0.405 |  |

Signif.codes: 0 ‘***’ 0.001 ‘**’ 0.01 ‘*’ 0.05 ‘.’ 0.1 ‘ ’ 1. Residual standard error: 0.02172 on 1733 degrees of freedom. Multiple R-squared: 0.09919, Adjusted R-squared: 0.09451. F-statistic: 21.2 on 9 and 1733 DF, p-value: < 2.2e-16.
