# Supplementary material for: Biotope Impact on Fluctuating Asymmetry Manifestation in Ground beetles (Coleoptera, Carabidae)
Source: Preprints.org preprint supplement (doi:10.20944/preprints202012.0491.v1), 2020-12-21
Supplement: Supplementary file 20 [file Table S7.docx]

lm(formula = FA_meristic ~ fBiotope * fSex, data = p)

| (a) Residuals: | | | | | |
| --- | --- | --- | --- | --- | --- |
| **Min** | **1Q** | **Median** | **3Q** | **Max** |  |
| -0.045639 | -0.005208 | -0.002938 | -0.002429 | 0.228218 |  |
| (b) Coefficients: | | | | | |
| **Source** | **Estimate** | **Std. Error** | **t value** | **Pr(>|t|)** |  |
| (Intercept) | 0.045639 | 0.003140 | 14.537 | < 2e-16 | *** |
| fBiotopebarley | -0.041901 | 0.003506 | -11.951 | < 2e-16 | *** |
| fBiotopecarrot | -0.039870 | 0.004275 | -9.326 | < 2e-16 | *** |
| fBiotopelucerne | -0.038232 | 0.004592 | -8.326 | < 2e-16 | *** |
| fBiotopemaize | -0.045639 | 0.004440 | -10.279 | < 2e-16 | *** |
| fBiotopeoats | -0.039272 | 0.003409 | -11.520 | < 2e-16 | *** |
| fBiotopepea | -0.042367 | 0.003702 | -11.444 | < 2e-16 | *** |
| fBiotopespring wheat | -0.043211 | 0.003622 | -11.931 | < 2e-16 | *** |
| fBiotopewinter wheat | -0.042701 | 0.003465 | -12.323 | < 2e-16 | *** |
| fSex2 | -0.017478 | 0.004217 | -4.145 | 3.57e-05 | *** |
| fBiotopebarley:fSex2 | 0.015436 | 0.004845 | 3.186 | 0.001470 | ** |
| fBiotopecarrot:fSex2 | 0.018959 | 0.006335 | 2.993 | 0.002806 | ** |
| fBiotopelucerne:fSex2 | 0.015279 | 0.005943 | 2.571 | 0.010230 | * |
| fBiotopemaize:fSex2 | 0.017478 | 0.006412 | 2.726 | 0.006477 | ** |
| fBiotopeoats:fSex2 | 0.015756 | 0.004796 | 3.285 | 0.001039 | ** |
| fBiotopepea:fSex2 | 0.026246 | 0.005243 | 5.006 | 6.13e-07 | *** |
| fBiotopespring wheat:fSex2 | 0.015950 | 0.005148 | 3.098 | 0.001978 | ** |
| fBiotopewinter wheat:fSex2 | 0.017091 | 0.004678 | 3.654 | 0.000266 | *** |

Signif.codes: 0 ‘***’ 0.001 ‘**’ 0.01 ‘*’ 0.05 ‘.’ 0.1 ‘ ’ 1. Residual standard error: 0.0201 on 1725 degrees of freedom. Multiple R-squared: 0.1324, Adjusted R-squared: 0.1239. F-statistic: 15.49 on 17 and 1725 DF, p-value: < 2.2e-16.
