# Supplementary material for: Biotope Impact on Fluctuating Asymmetry Manifestation in Ground beetles (Coleoptera, Carabidae)
Source: Preprints.org preprint supplement (doi:10.20944/preprints202012.0491.v1), 2020-12-21
Supplement: Supplementary file 23 [file Table S8.docx]

lm(formula = FA_meristic ~ fBiotope + fSex, data = p)

| (a) Residuals: | | | | | |
| --- | --- | --- | --- | --- | --- |
| **Min** | **1Q** | **Median** | **3Q** | **Max** |  |
| -0.036541 | -0.006106 | -0.003294 | -0.002229 | 0.228541 |  |
| (b) Coefficients: | | | | | |
| **Source** | **Estimate** | **Std. Error** | **t value** | **Pr(>|t|)** |  |
| (Intercept) | 0.0365411 | 0.0021771 | 16.784 | <2e-16 | *** |
| fBiotopebarley | -0.0332209 | 0.0024212 | -13.721 | <2e-16 | *** |
| fBiotopecarrot | -0.0298129 | 0.0031261 | -9.537 | <2e-16 | *** |
| fBiotopelucerne | -0.0298594 | 0.0029204 | -10.224 | <2e-16 | *** |
| fBiotopemaize | -0.0360910 | 0.0031947 | -11.297 | <2e-16 | *** |
| fBiotopeoats | -0.0303953 | 0.0023800 | -12.771 | <2e-16 | *** |
| fBiotopepea | -0.0293695 | 0.0026095 | -11.255 | <2e-16 | *** |
| fBiotopespring wheat | -0.0342853 | 0.0025559 | -13.414 | <2e-16 | *** |
| fBiotopewinter wheat | -0.0332472 | 0.0023394 | -14.212 | <2e-16 | *** |
| fSex2 | -0.0010652 | 0.0009906 | -1.075 | 0.282 |  |

Signif.codes: 0 ‘***’ 0.001 ‘**’ 0.01 ‘*’ 0.05 ‘.’ 0.1 ‘ ’ 1. Residual standard error: 0.02021 on 1733 degrees of freedom. Multiple R-squared: 0.1194, Adjusted R-squared: 0.1148. F-statistic: 26.1 on 9 and 1733 DF, p-value: < 2.2e-16.
