# Supplementary material for: Biotope Impact on Fluctuating Asymmetry Manifestation in Ground beetles (Coleoptera, Carabidae)
Source: Preprints.org preprint supplement (doi:10.20944/preprints202012.0491.v1), 2020-12-21
Supplement: Supplementary file 26 [file list of supplementary tables.docx]

Supplementary

Table S1. Classical type II analysis of variance for FA in dimensional trait (the effect of interaction against the background of all the others)

Table S2. Classical type II analysis of variance for FA in dimensional trait (the effect of variable against the background of all others)

Table S3. Classical type II analysis of variance for FA in meristic trait (the effect of interaction against the background of all the others)

Table S4. Classical type II analysis of variance for FA in meristic trait (the effect of variable against the background of all others)

Table S5. Classical type II analysis of variance for FA in dimensional trait in *P. cupteus* (the effect of interaction against the background of all the others)

Table S6. Classical type II analysis of variance for FA in dimensional trait *P. cupteus* (the effect of variable against the background of all others)

Table S7. Classical type II analysis of variance for FA in meristic trait *P. cupteus* (the effect of interaction against the background of all the others)

Table S8. Classical type II analysis of variance for FA in meristic trait *P. cupteus* (the effect of variable against the background of all others)
